# Supplementary material for: Clinical sequencing of soft tissue and bone sarcomas delineates diverse genomic landscapes and potential therapeutic targets
Source: PubMed Central journal article supplement (PMC9200818; doi:10.1038/s41467-022-30453-x), 2022-06-15
Supplement: 41467_2022_30453_MOESM1_ESM.pdf [file 41467_2022_30453_MOESM1_ESM.pdf]

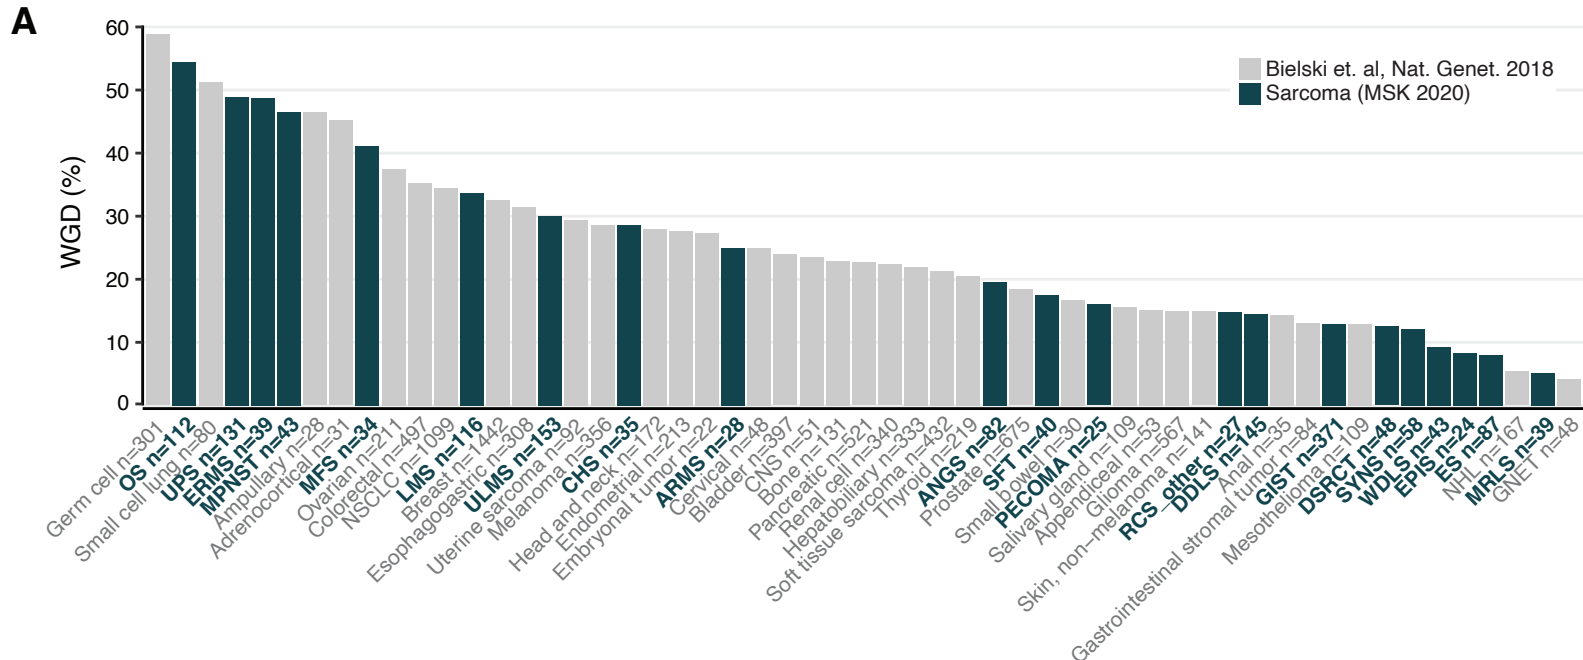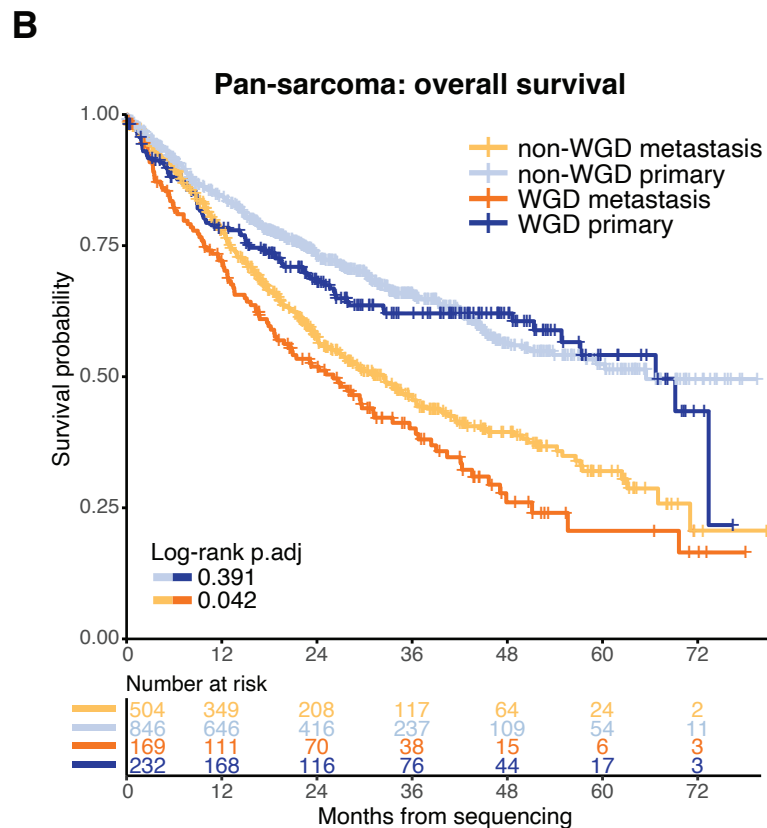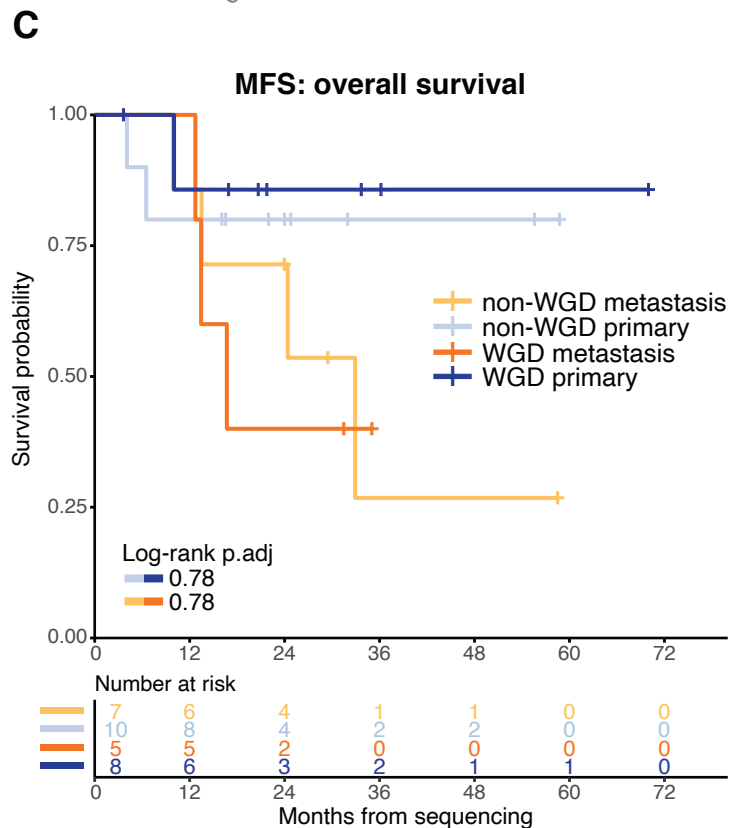

**Supplementary Figure 1. Whole genome doubling (WGD) and survival probability. A**, Frequency of WGD by subtype (green) compared to other cancers (all available samples) (gray). **B-C**, Overall survival based on WGD status within metastatic and primary tumor cohorts in **B**, all sarcoma subtypes; **C**, MFS.



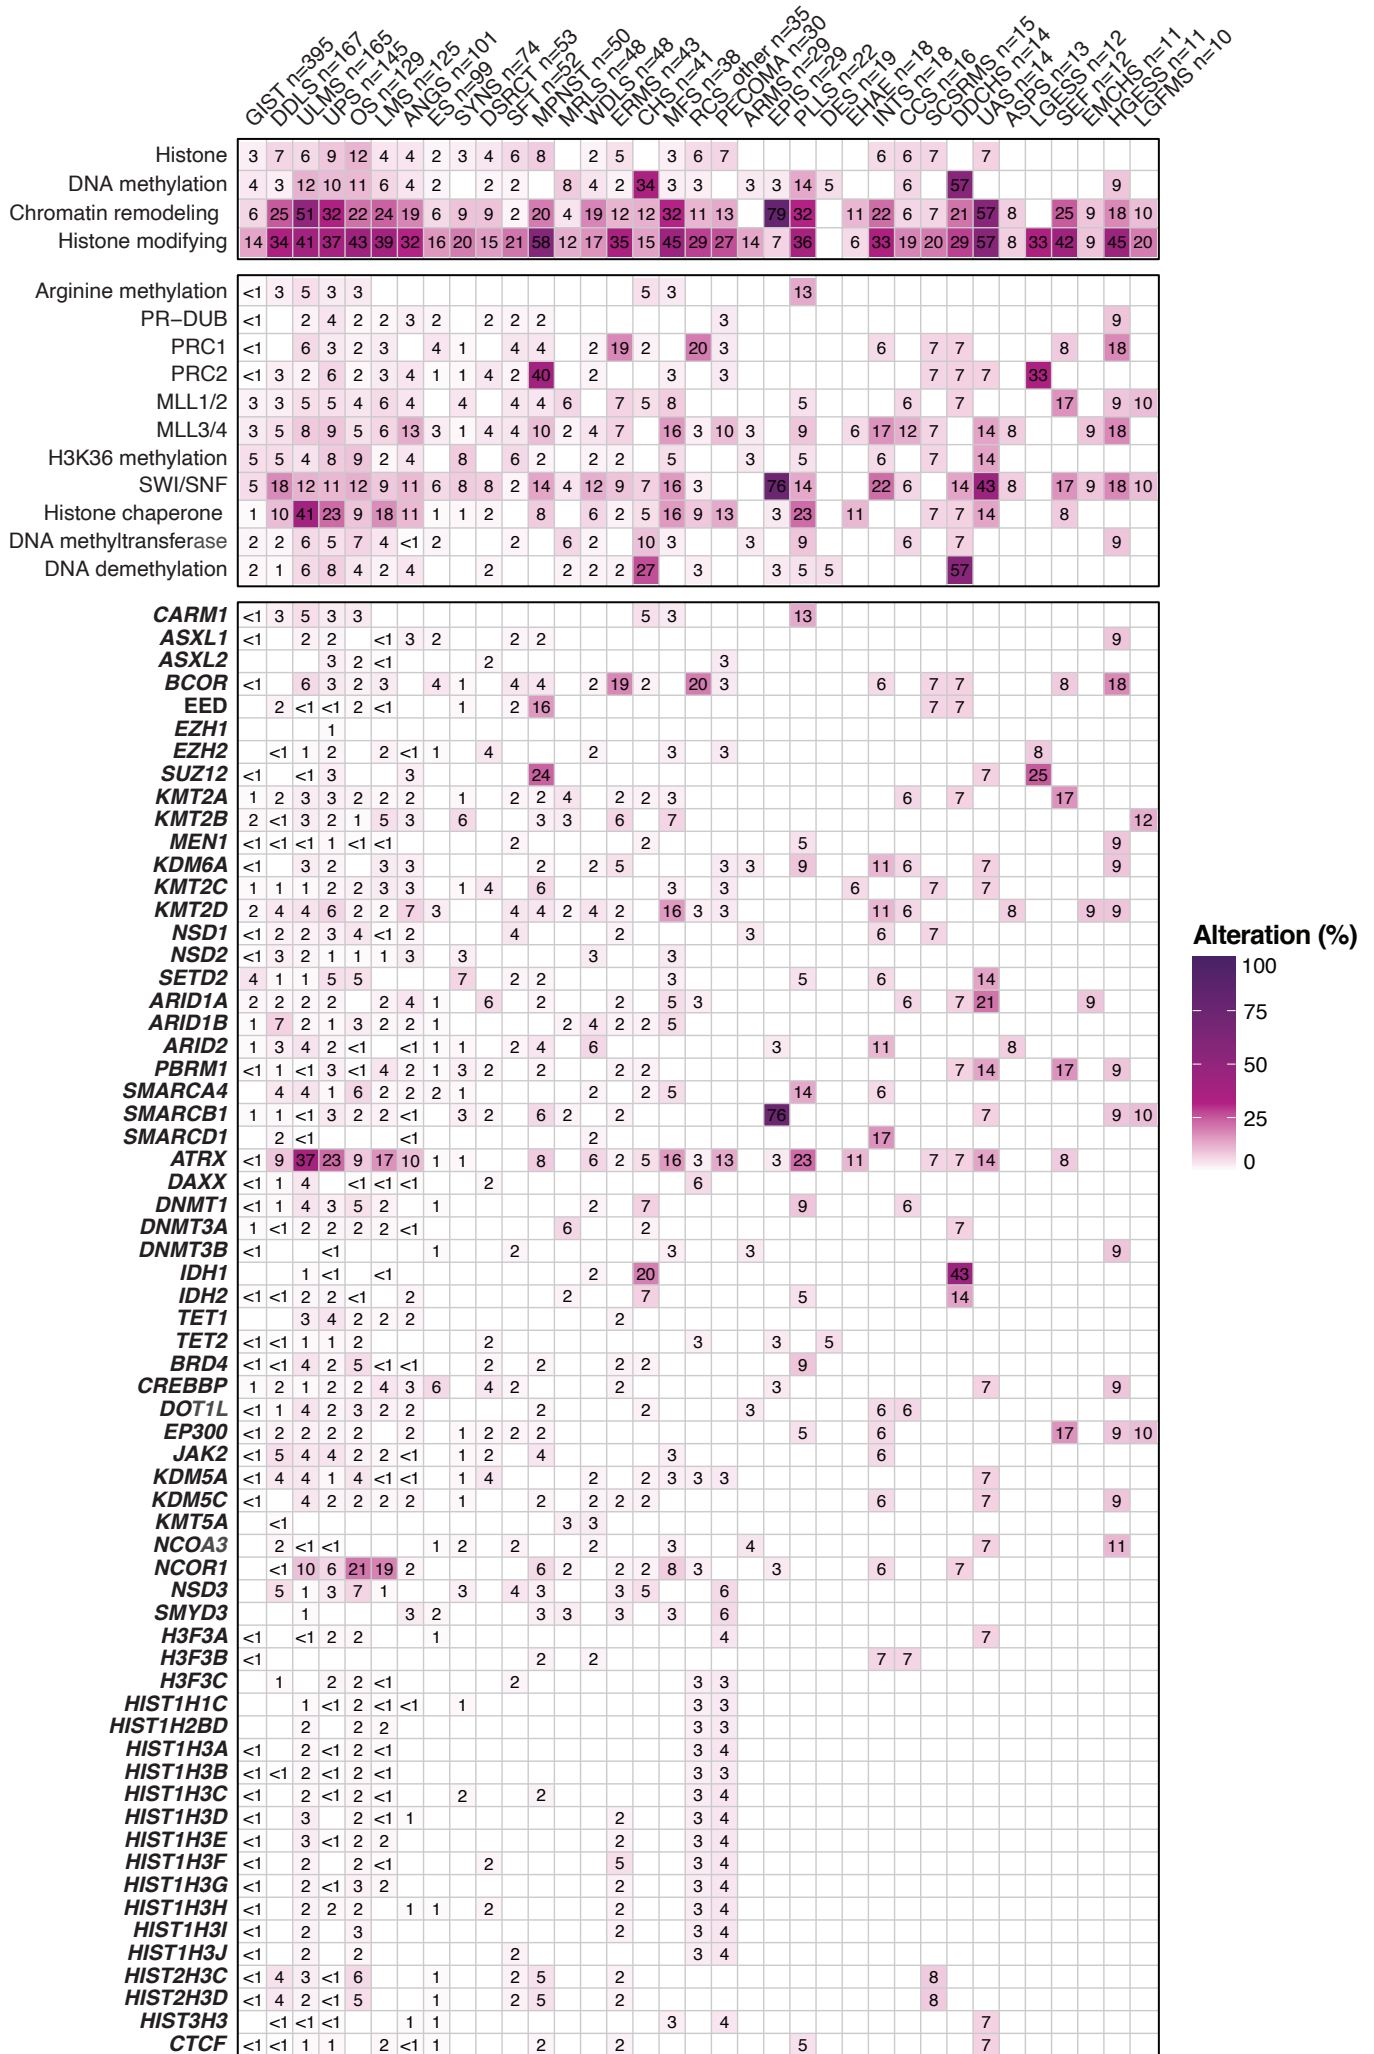

**Supplementary Figure 3. All epigenetic pathway alterations, including variants of unknown significance (VUS). Frequency of somatic alterations in epigenetic pathway genes in each subtype with ≥ 10 samples. Top , aggregate number of alterations in each gene family and biochemical process.**

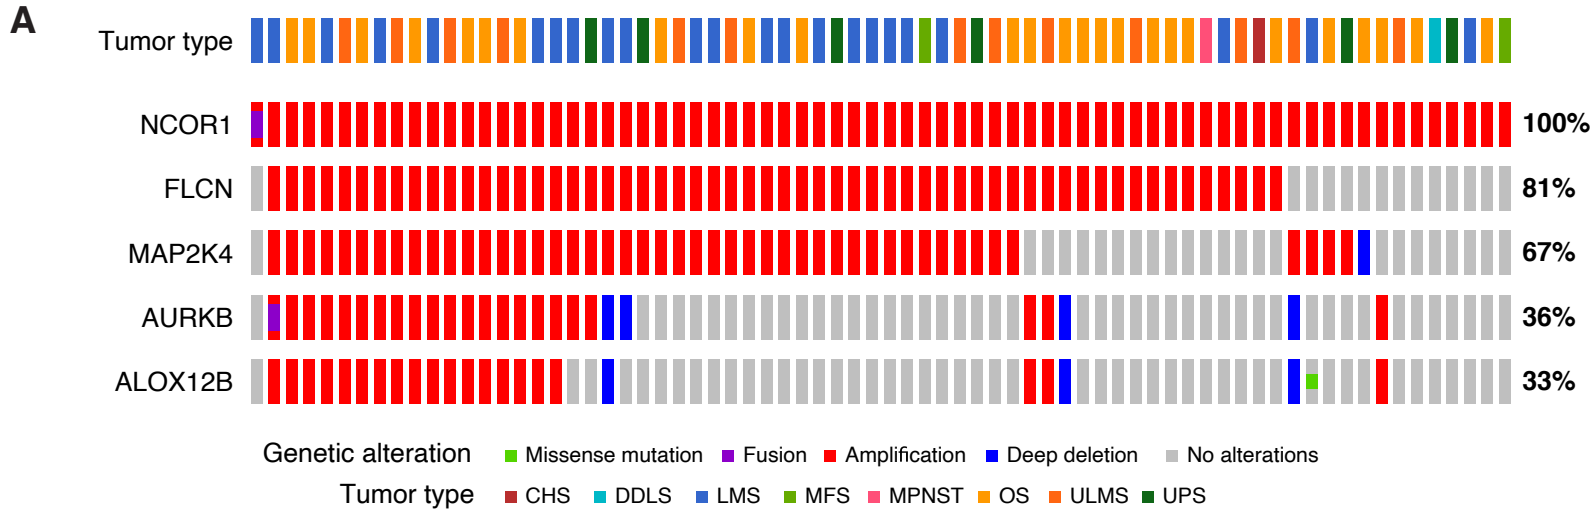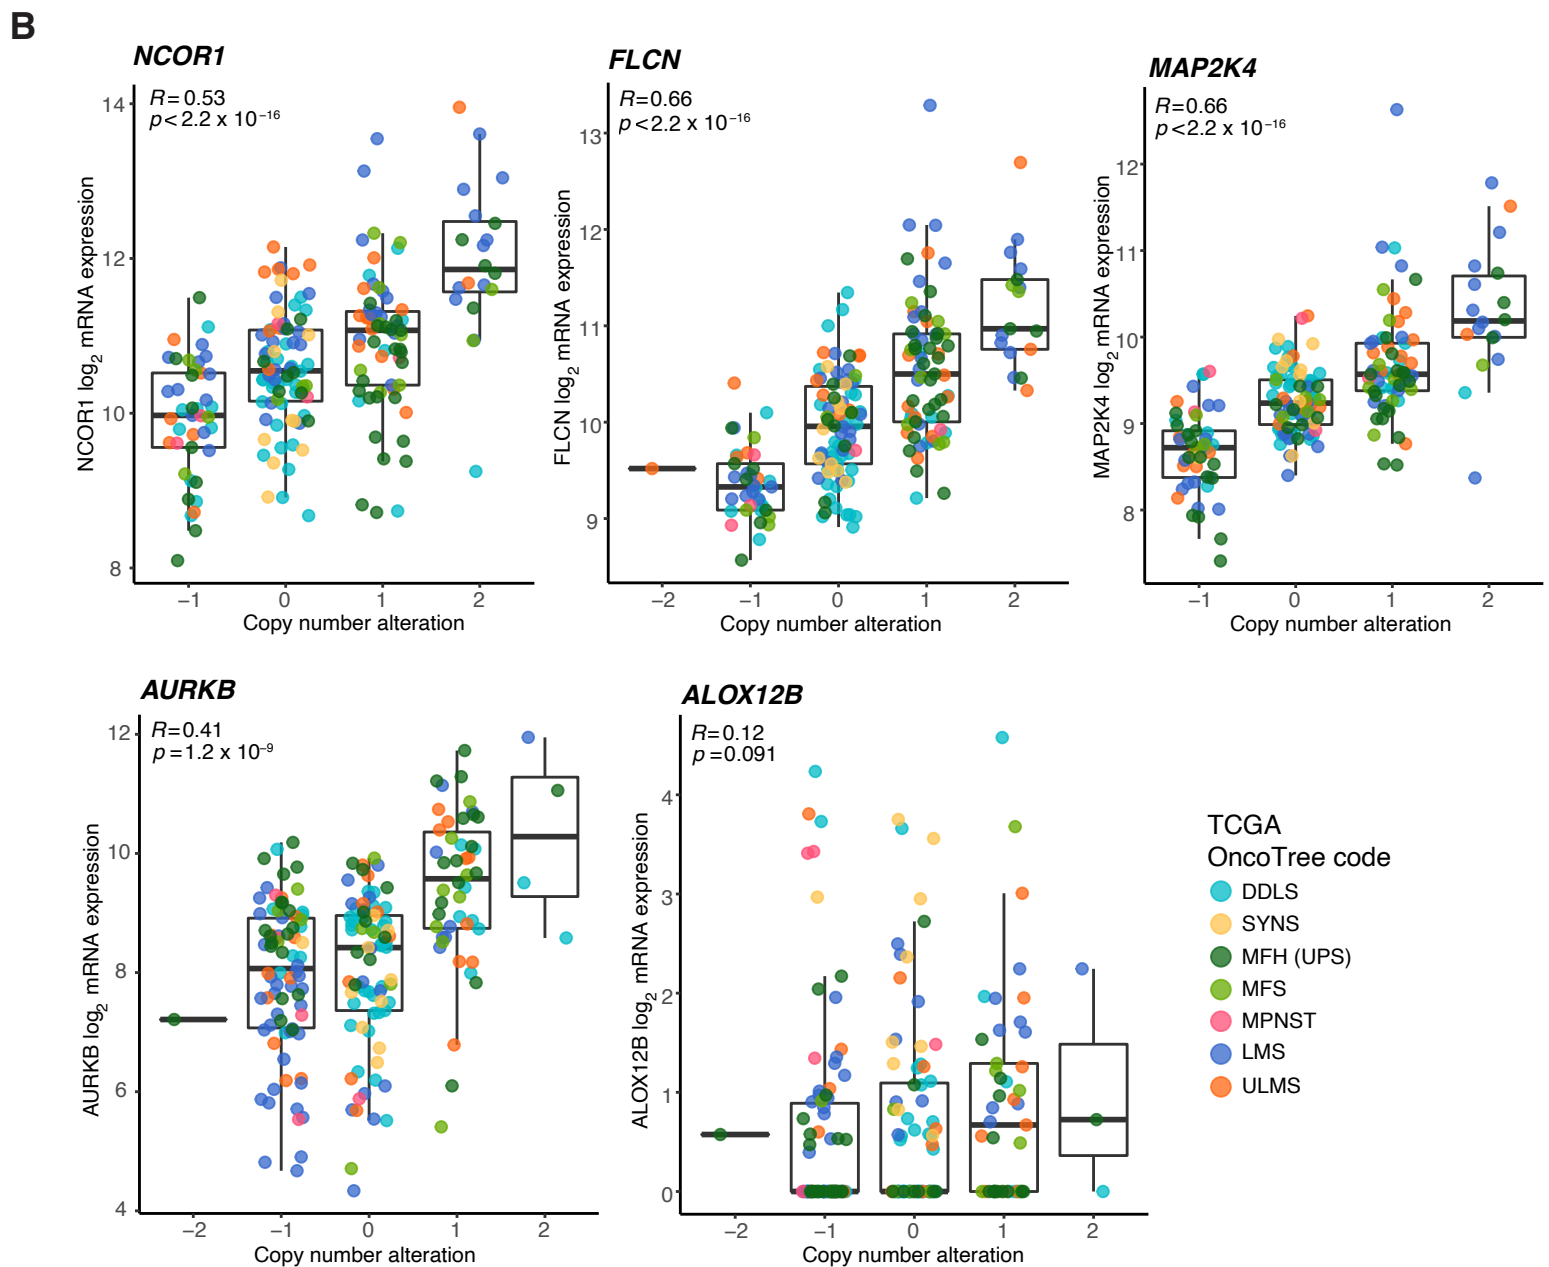

**Supplementary Figure 4. Amplification and expression of 17p12-p11.2 genes NCOR1, FLCN, MAP2K4, AURKB, and ALOX12B.** **A**, Oncoprint demonstrating the frequency of co-amplification of other genes at cytoband 17p12-p11.2 in the MSK-IMPACT panel in cases where NCOR1 is amplified. **B**, Correlation of gene expression in the sarcoma TCGA dataset with CNV. Box boundaries indicate 25<sup>th</sup> and 75<sup>th</sup> percentiles, interior lines indicate medians, and whiskers indicate 1.5 times the interquartile range. P values calculated by Spearman's rank correlation.

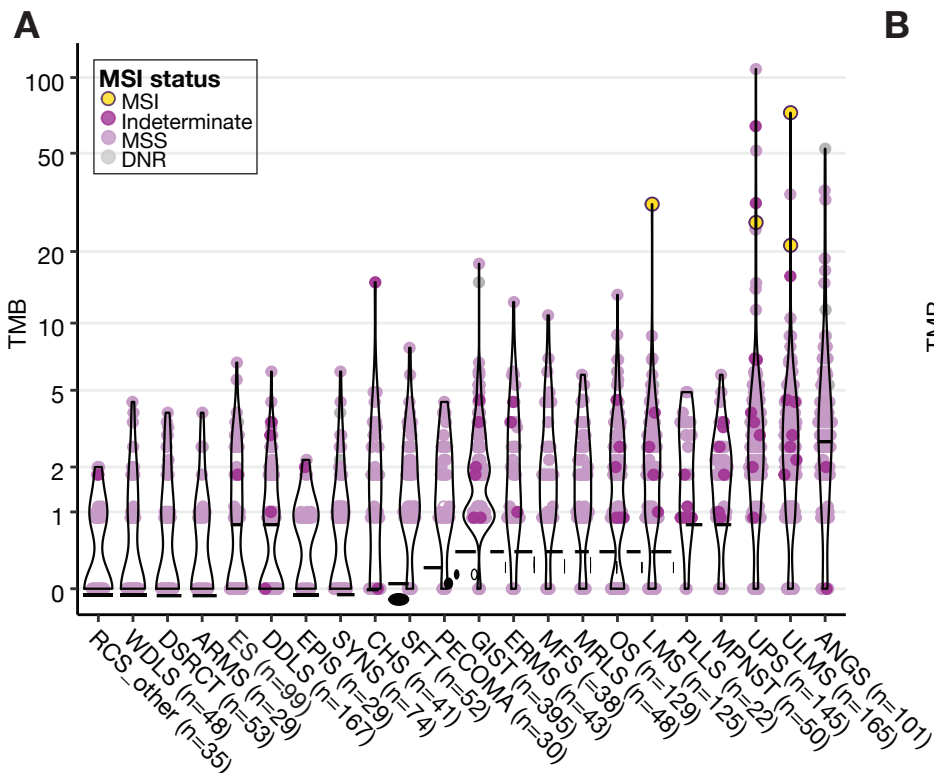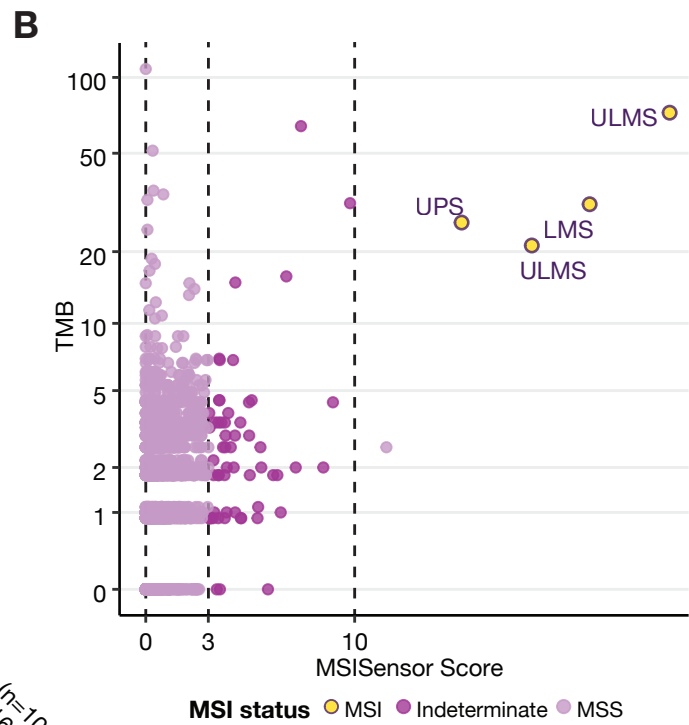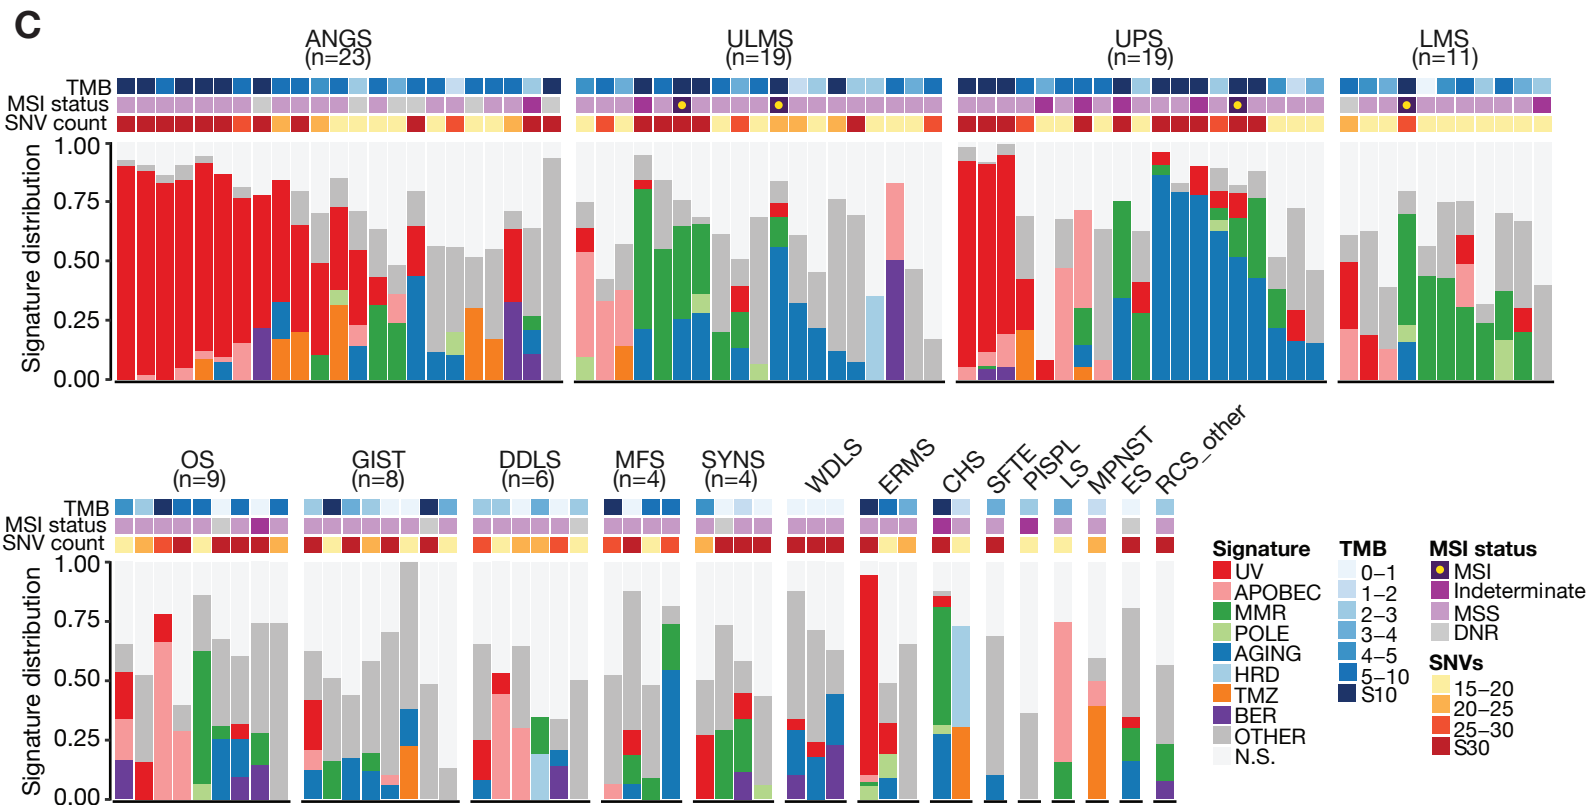

**Supplementary Figure 5. Tumor mutation burden (TMB), microsatellite instability (MSI) status, and mutational signatures. A**, Distribution of TMB (mutations/Mb) by subtype with sample-level MSI status. **B**, MSISensor score versus TMB for the cohort with sample-level MSI status. **C**, Mutational signature profile of each evaluable sample. Each bar represents the signature distribution of an individual sample, grouped by subtype. TMB, MSI status, and single nucleotide polymorphism (SNV) count are shown above.

**Supplementary Table 1.** Patient characteristics by subtype.

| SAMPLES          | AGE   |                 |       | SEX  |        | SAMPLE TYPE |         |
|------------------|-------|-----------------|-------|------|--------|-------------|---------|
|                  | Count | Mean $\pm$ SD   | Range | Male | Female | Metastatic  | Primary |
| <b>TOTAL</b>     | 2138  | 49.3 $\pm$ 20.0 | 0–90  | 1040 | 1098   | 790         | 1348    |
| <b>GIST</b>      | 395   | 58.5 $\pm$ 14.2 | 11–90 | 213  | 182    | 123         | 272     |
| <b>DDL5</b>      | 167   | 62.1 $\pm$ 11.7 | 29–90 | 115  | 52     | 58          | 109     |
| <b>ULMS</b>      | 165   | 57.2 $\pm$ 10.3 | 30–83 | 0    | 165    | 91          | 74      |
| <b>UPS</b>       | 145   | 55.6 $\pm$ 18.1 | 3–87  | 74   | 71     | 52          | 93      |
| <b>OS</b>        | 129   | 26.1 $\pm$ 16.6 | 8–78  | 79   | 50     | 52          | 77      |
| <b>LMS</b>       | 125   | 57.8 $\pm$ 14.6 | 7–83  | 49   | 76     | 71          | 54      |
| <b>ANGS</b>      | 101   | 58.6 $\pm$ 16.7 | 15–89 | 41   | 60     | 24          | 77      |
| <b>ES</b>        | 99    | 26.9 $\pm$ 16.1 | 2–79  | 60   | 39     | 28          | 71      |
| <b>SYNS</b>      | 74    | 40.7 $\pm$ 16.0 | 7–85  | 36   | 38     | 24          | 50      |
| <b>DSRCT</b>     | 53    | 23.4 $\pm$ 9.4  | 8–48  | 48   | 5      | 24          | 29      |
| <b>SFT</b>       | 52    | 60.2 $\pm$ 11.0 | 39–80 | 25   | 27     | 22          | 30      |
| <b>MPNST</b>     | 50    | 43.7 $\pm$ 20.2 | 11–89 | 30   | 20     | 12          | 38      |
| <b>MRLS</b>      | 48    | 44.7 $\pm$ 13.4 | 13–67 | 29   | 19     | 16          | 32      |
| <b>WDLS</b>      | 48    | 57.8 $\pm$ 9.9  | 34–74 | 27   | 21     | 25          | 23      |
| <b>ERMS</b>      | 43    | 15.5 $\pm$ 16.8 | 1–70  | 20   | 23     | 7           | 36      |
| <b>CHS</b>       | 41    | 47.9 $\pm$ 15.4 | 16–76 | 26   | 15     | 16          | 25      |
| <b>MFS</b>       | 38    | 64.5 $\pm$ 12.6 | 31–80 | 21   | 17     | 13          | 25      |
| <b>RCS_other</b> | 35    | 27.8 $\pm$ 18.0 | 0–70  | 14   | 21     | 3           | 32      |
| <b>PECOMA</b>    | 30    | 55.9 $\pm$ 15.0 | 14–76 | 7    | 23     | 15          | 15      |
| <b>ARMS</b>      | 29    | 23.5 $\pm$ 16.4 | 1–67  | 16   | 13     | 13          | 16      |
| <b>EPIS</b>      | 29    | 38.5 $\pm$ 15.2 | 16–67 | 14   | 15     | 9           | 20      |
| <b>PLLS</b>      | 22    | 53.0 $\pm$ 18.9 | 12–87 | 10   | 12     | 8           | 14      |



**Supplementary Table 3.** Biochemical function/complex assignments for epigenetic pathway genes.

| <b>DNA methylation</b> |                       | <b>Histone modifying</b> |                      | <b>Chromatin remodeling/histone chaperone</b> |                      | <b>Histone</b> | <b>Other</b> |
|------------------------|-----------------------|--------------------------|----------------------|-----------------------------------------------|----------------------|----------------|--------------|
| Gene                   | Group classification  | Gene                     | Group classification | Gene                                          | Group classification | Gene           | CTCF         |
| DNMT1                  | DNA methyltransferase | ASXL1                    | PR-DUB               | ARID1A                                        | SWI/SNF              | H3F3A          |              |
| DNMT3A                 | DNA methyltransferase | ASXL2                    | PR-DUB               | ARID1B                                        | SWI/SNF              | H3F3B          |              |
| DNMT3B                 | DNA methyltransferase | BCOR                     | PRC1                 | ARID2                                         | SWI/SNF              | H3F3C          |              |
| IDH1                   | DNA demethylation     | BRD4                     |                      | ATRX                                          | Histone chaperone    | HIST1H1C       |              |
| IDH2                   | DNA demethylation     | CARM1                    | Arginine methylation | DAXX                                          | Histone chaperone    | HIST1H2BD      |              |
| TET1                   | DNA demethylation     | CREBBP                   |                      | PBRM1                                         | SWI/SNF              | HIST1H3A       |              |
| TET2                   | DNA demethylation     | DOT1L                    |                      | SMARCA4                                       | SWI/SNF              | HIST1H3B       |              |
|                        |                       | EED                      | PRC2                 | SMARCB1                                       | SWI/SNF              | HIST1H3C       |              |
|                        |                       | EP300                    |                      | SMARCD1                                       | SWI/SNF              | HIST1H3D       |              |
|                        |                       | EZH1                     | PRC2                 |                                               |                      | HIST1H3E       |              |
|                        |                       | EZH2                     | PRC2                 |                                               |                      | HIST1H3F       |              |
|                        |                       | JAK2                     |                      |                                               |                      | HIST1H3G       |              |
|                        |                       | KDM5A                    |                      |                                               |                      | HIST1H3H       |              |
|                        |                       | KDM5C                    |                      |                                               |                      | HIST1H3I       |              |
|                        |                       | KDM6A                    | MLL3/4               |                                               |                      | HIST1H3J       |              |
|                        |                       | KMT2A                    | MLL1/2               |                                               |                      | HIST2H3C       |              |
|                        |                       | KMT2B                    | MLL1/2               |                                               |                      | HIST2H3D       |              |
|                        |                       | KMT2C                    | MLL3/4               |                                               |                      | HIST3H3        |              |
|                        |                       | KMT2D                    | MLL3/4               |                                               |                      |                |              |
|                        |                       | KMT5A                    |                      |                                               |                      |                |              |
|                        |                       | MEN1                     | MLL1/2               |                                               |                      |                |              |
|                        |                       | NCOA3                    |                      |                                               |                      |                |              |
|                        |                       | NCOR1                    |                      |                                               |                      |                |              |
|                        |                       | NSD1                     | H3K36 methylation    |                                               |                      |                |              |
|                        |                       | NSD2                     | H3K36 methylation    |                                               |                      |                |              |
|                        |                       | NSD3                     |                      |                                               |                      |                |              |
|                        |                       | SETD2                    | H3K36 methylation    |                                               |                      |                |              |
|                        |                       | SMYD3                    |                      |                                               |                      |                |              |
|                        |                       | SUZ12                    | PRC2                 |                                               |                      |                |              |
